# The American Journal of Psychiatry

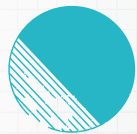

CONFRONTING ADDICTION  
From Prevention to Recovery

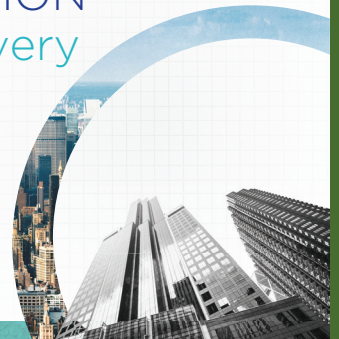

The Developmental Trajectory to Cannabis Use Disorder

Drugs and Addiction Science: NIDA Celebrates 50 Years  
of Research and Looks to the Future

Vaccines as Immunotherapies for Substance Use Disorders

Neural Correlates of Stress and Alcohol Cue-Induced Alcohol Craving  
and of Future Heavy Drinking: Evidence of Sex Differences

Predictors of Substance Use Initiation by Early Adolescence
