# DSM-5-TR<sup>®</sup> DIAGNOSTIC CRITERIA APP

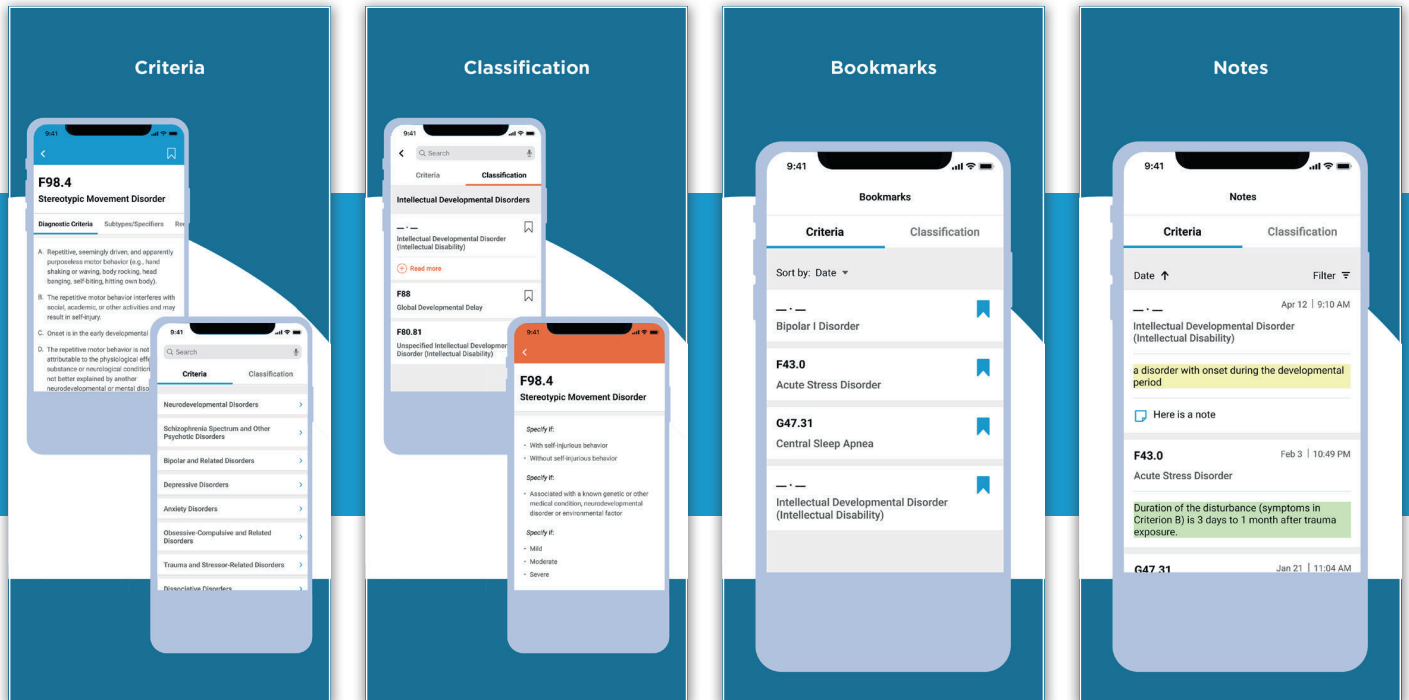

The new DSM-5-TR<sup>®</sup> Diagnostic Criteria Mobile App has been fully redesigned and is a concise companion to the ultimate psychiatric reference, *Diagnostic and Statistical Manual of Mental Disorders, Fifth Edition, Text Revision (DSM-5-TR<sup>®</sup>)*. It includes the fully revised diagnostic classification, as well as all the diagnostic criteria from DSM-5-TR<sup>®</sup> in an easy-to-use format. This handy reference provides mental health practitioners, researchers, and students quick access to the information essential to making a diagnosis.

## Features:

- Fully redesigned and updated user interface
- Improved presentation of tables and charts
- Dual-use modes for toggling between the diagnostic criteria and classification
- Up-to-date access to ICD-10-CM codes for clinical and administrative use
- Over 70 modified criteria sets with helpful clarifications since publication of DSM-5<sup>®</sup>
- Bookmark frequently used information and add notes for easy reference later.

Available for both **iOS** and **Android** compatible devices through the iTunes App store and Google Play.

# Substance USE

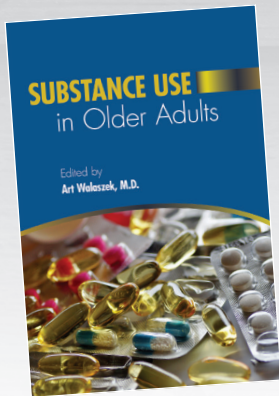

## Substance Use in Older Adults

Edited by Art Walaszek, M.D.

In this new volume, more than 20 contributors translate real-world experience in geriatric psychiatry into an accessible, evidence-based guide that examines not only the etiology and epidemiology of substance use in older patients but also its comorbidities and management.

2024 • 365 pages • ISBN 978-1-61537-507-3  
Paperback • \$62.00 • Item #37507

2024 • 365 pages • ISBN 978-1-61537-508-0  
eBook • \$50.00 • Item #37508

## Pharmacotherapy for Complex Substance Use Disorders

A Practical Guide

Edited by Thanh Thuy Truong, M.D., Benjamin Li, M.D., Daryl Shorter, M.D., Nidal Moukaddam, M.D., Ph.D., and Thomas R. Kosten, M.D.

This book provides information on the neurobiology of addiction, general approaches to taking a history, guidelines for making medical and psychiatric evaluations and forming a diagnosis, and discussion of the pharmacological treatment of a range of substances.

2024 • 356 pages • ISBN 978-1-61537-495-3  
Paperback • \$72.00 • Item #37495

2024 • 356 pages • ISBN 978-1-61537-496-0  
eBook • \$58.00 • Item #37496

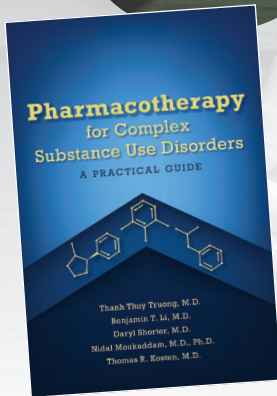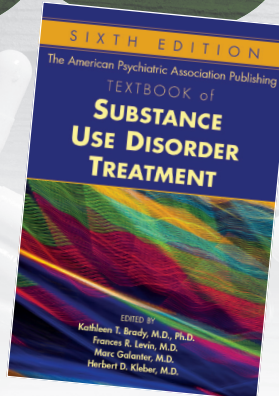

## The American Psychiatric Association Publishing Textbook of Substance Use Disorder Treatment, Sixth Edition

Edited by Kathleen T. Brady, M.D., Ph.D., Frances R. Levin, M.D., Marc Galanter, M.D., and Herbert D. Kleber, M.D.

A one-stop reference for evidence-based information on neurobiology, assessment, treatment, and research trends in substance use disorders, the book is an indispensable resource for trainees and veteran clinicians alike.

2021 • 912 pages • ISBN 978-1-61537-221-8  
Hardcover • \$215.00 • Item #37221

2021 • 912 pages • ISBN 978-1-61537-353-6  
eBook • \$175.00 • Item #37353

## Addiction and the Law

Elie G Aoun, M.D., Debra A. Pinals, M.D., and Laurence Westreich, M.D.

**Contents:** Section I: Introduction and Overview. Section II: Civil Issues. Section III: Criminal Issues. Section IV: Special Topics.

2025 • 360 pages • ISBN 978-1-61537-401-4  
Paperback • \$78.00 • Item #37401

2025 • 360 pages • ISBN 978-1-61537-402-1  
eBook • \$62.00 • Item #37402

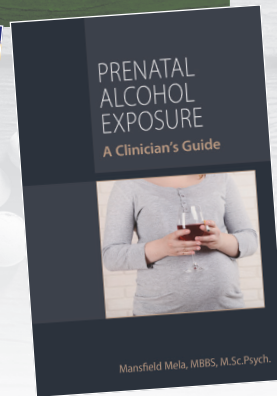

## Prenatal Alcohol Exposure A Clinician's Guide

Mansfield Mela, M.B. B.S., M.Sc.Psych.

This book provides content useful for professional training across mental health disciplines and addresses topics missing from medical curricula, including the long-term effects of PAE, in-depth discussion of fetal alcohol spectrum disorder (FASD), and clinical information on the mental disorders relevant to FASD.

2021 • 472 pages • ISBN 978-1-61537-239-3  
Paperback • \$72.00 • Item #37239

2021 • 472 pages • ISBN 978-1-61537-369-7  
eBook • \$58.00 • Item #37369

## The American Opioid Epidemic From Patient Care to Public Health

Edited by Michael T. Compton, M.D., M.P.H., and Marc W. Manseau, M.D., M.P.H.

Comprehensive, yet concise and clinically relevant, this is the resource mental health practitioners need to understand current thinking on the complex issues surrounding opioid abuse.

2019 • 459 pages • ISBN 978-1-61537-157-0  
Paperback • \$65.00 • Item #37157

2019 • 459 pages • ISBN 978-1-61537-214-0  
eBook • \$52.00 • Item #37214

2019 • 459 pages • ISBN 978-1-61537-274-4  
Audio Book • \$65.00 • Item #37274

## Subscription and Business Information

*The American Journal of Psychiatry*, ISSN 0002-953X, is published monthly by the American Psychiatric Association.

The American Psychiatric Association does not hold itself responsible for statements made in its publications by contributors or advertisers. Unless so stated, material in *The American Journal of Psychiatry* does not reflect the endorsement, official attitude, or position of the American Psychiatric Association or of the Journal's Editorial Board.

Periodicals postage paid at Washington, DC, and additional mailing offices. POSTMASTER: Send address changes to *The American Journal of Psychiatry*, Circulation Department, American Psychiatric Association, 800 Maine Avenue, S.W., Suite 900, Washington, D.C. 20024.

### Editorial Office

*American Journal of Psychiatry*  
American Psychiatric Association  
800 Maine Avenue, S.W., Suite 900  
Washington, D.C. 20024  
E-mail: [ajp@psych.org](mailto:ajp@psych.org)

### Customer Service

Phone: (800) 368-5777 (toll-free)  
E-mail: [appi@psych.org](mailto:appi@psych.org)

### APA Member Subscription Services

Phone: (888) 35-PSYCH (toll-free)

### Subscriptions

Regular and resident-fellow members in the U.S. receive print and online access as a **member benefit**. Subscriptions for non-members start at \$378 per year. Online only subscriptions start at \$342 per year. Go to <https://www.appi.org/ajp> for more information.

Institutional subscriptions are tier priced. For institutional site license or pricing information, contact (202) 559-3729 or [institutions@psych.org](mailto:institutions@psych.org).

*Additional subscription options, including single issues and student rates*  
Contact Customer Service

### Advertising

*Pharmaceutical Print and Online Advertising*  
Frank Cox, Kathleen Harrison, Tim Wolfinger  
Pharmaceutical Media, Inc.  
30 East 33rd Street  
New York, NY 10016  
Phone: (212) 904-0379  
E-mail: [twolfinger@pminy.com](mailto:twolfinger@pminy.com)

*Nonpharmaceutical and Online Sales*  
Eamon Wood  
Pharmaceutical Media, Inc.  
E-mail: [ewood@pminy.com](mailto:ewood@pminy.com)  
(see address and phone above).

### Permissions and Reprints

Material published in the journals of the American Psychiatric Association and American Psychiatric Association Publishing is protected by copyright and all rights are reserved. Material may not be reproduced in any form or by any means without written permission from the copyright owner. For permission to reproduce material published by APA, please visit <http://www.appi.org/customer-service/permissions> for more information. Permission can also be secured through the Copyright Clearance Center ([www.copyright.com](http://www.copyright.com)).

APA does not require that permission be obtained for the photocopying of isolated articles for nonprofit classroom or library reserve use; all fees associated with such permission are waived. This consent does not extend to other kinds of copying, such as copying for general distribution, for advertising or promotional purposes, for creating new collective works, or for resale. Requests for commercial distribution and bulk reprints should be directed to (202) 609-7075.

Indexed in Abstracts for Social Workers, Academic Abstracts, Biological Abstracts, Chemical Abstracts, Chicago Psychoanalytic Literature Index, Cumulative Index to Nursing Literature, Excerpta Medica, Hospital Literature Index, Index Medicus, International Nursing Index, Nutrition Abstracts, Psychological Abstracts, Science Citation Index, Social Science Source, and Social Sciences Index.

Pages are produced by TNQ Technologies (Chennai, India) effective with Volume 179, Number 3, March 2022, and printed by Sheridan NH (Hanover, NH) on acid-free paper effective with Volume 169, Number 1, January 2012.

© 2024 American Psychiatric Association.

# INGREZZA® (valbenazine) capsules

for oral use

**Brief Summary:** for full Prescribing Information and Patient Information, refer to package insert.

## INDICATIONS AND USAGE

INGREZZA® (valbenazine) capsules is indicated in adults for the treatment of tardive dyskinesia and for the treatment of chorea associated with Huntington's disease.

## WARNING: DEPRESSION AND SUICIDAL IDEATION AND BEHAVIOR IN PATIENTS WITH HUNTINGTON'S DISEASE

**VMAT2 inhibitors, including INGREZZA, can increase the risk of depression and suicidal thoughts and behavior in patients with Huntington's disease. Anyone considering the use of INGREZZA must balance the risks of depression and suicidal ideation and behavior with the clinical need for treatment of chorea. Closely monitor patients for the emergence or worsening of depression, suicidal ideation, or unusual changes in behavior. Inform patients, their caregivers, and families of the risk of depression and suicidal ideation and behavior and instruct them to report behaviors of concern promptly to the treating physician.**

**Particular caution should be exercised in treating patients with a history of depression or prior suicide attempts or ideation, which are increased in frequency in patients with Huntington's disease.**

## CONTRAINDICATIONS

INGREZZA is contraindicated in patients with a history of hypersensitivity to valbenazine or any components of INGREZZA. Rash, urticaria, and reactions consistent with angioedema (e.g., swelling of the face, lips, and mouth) have been reported.

## WARNINGS AND PRECAUTIONS

### Depression and Suicidal Ideation and Behavior in Patients with Huntington's Disease

Patients with Huntington's disease are at increased risk for depression, and suicidal ideation or behaviors. VMAT2 inhibitors, including INGREZZA, can increase the risk for suicidal ideation and behaviors in patients with Huntington's disease.

In a 14-week, double-blind, placebo-controlled trial, depression or depressed mood was reported in 4.7% of patients taking INGREZZA compared to 1.6% of patients who received placebo, and no patients taking INGREZZA reported suicidal ideation or behavior compared to 1 patient (1.6%) who received placebo. Patients with significant risk for suicidal behavior or with unstable psychiatric symptoms were excluded from this trial. Suicidal ideation (9 subjects; 7.2%) and suicide attempts (3 subjects; 2.4%) were reported in the longer open-label extension trial (N = 125).

When considering the use of INGREZZA, the risk of suicidal ideation and behaviors must be balanced against the need for treatment of chorea. All patients treated with INGREZZA should be observed for new or worsening depression, suicidal ideation or behaviors. If any of these reactions occur and do not resolve, consider discontinuing treatment with INGREZZA.

### Hypersensitivity Reactions

Hypersensitivity reactions, including cases of angioedema involving the larynx, glottis, lips, and eyelids, have been reported in the post-marketing setting in patients after taking the first or subsequent doses of INGREZZA. A case of angioedema involving the lips and face, with rash and shortness of breath was reported in a patient with Huntington's disease taking INGREZZA during a clinical study. Urticaria and rash were also reported during a clinical study in patients with Huntington's disease. Angioedema associated with laryngeal edema can be fatal. If any of these reactions occur, discontinue INGREZZA.

### Somnolence and Sedation

INGREZZA can cause somnolence and sedation, which was the most common adverse reaction in placebo-controlled trials. Patients should not perform activities requiring mental alertness such as operating a motor vehicle or operating hazardous machinery until they know how they will be affected by INGREZZA.

### QT Prolongation

INGREZZA may prolong the QT interval, although the degree of QT prolongation is not clinically significant at concentrations expected with recommended dosing. In patients taking a strong CYP2D6 or CYP3A4 inhibitor, or who are CYP2D6 poor metabolizers, INGREZZA concentrations may be higher and QT prolongation clinically significant. For patients who are CYP2D6 poor metabolizers or are taking a strong CYP2D6 inhibitor, dose reduction may be necessary. For patients taking a strong CYP3A4 inhibitor, reduce the dose of INGREZZA to 40 mg once daily. INGREZZA should be avoided in patients with congenital long QT syndrome or with arrhythmias associated with a prolonged QT interval. For patients at increased risk of a prolonged QT interval, assess the QT interval before increasing the dosage.

### Neuroleptic Malignant Syndrome (NMS)

A potentially fatal symptom complex referred to as Neuroleptic Malignant Syndrome (NMS) has been reported in association with drugs that reduce dopaminergic transmission. In the post-marketing setting, NMS has been reported in patients taking VMAT2 inhibitors, including INGREZZA. Clinicians should be alerted to the signs and symptoms associated with NMS. Clinical manifestations of NMS are hyperpyrexia, muscle rigidity, altered mental status, and evidence of autonomic instability (irregular pulse or blood pressure, tachycardia, diaphoresis, and cardiac dysrhythmia). Additional signs may include elevated creatine phosphokinase, myoglobinuria, rhabdomyolysis, and acute renal failure. The diagnosis of NMS can be complicated; other serious medical illness (e.g., pneumonia, systemic infection) and untreated or inadequately treated extrapyramidal disorders can present with similar signs and symptoms. Other important considerations in the differential diagnosis include central anticholinergic toxicity, heat stroke, drug fever, and primary central nervous system pathology.

The management of NMS should include (1) immediate discontinuation of INGREZZA; (2) intensive symptomatic treatment and medical monitoring; and (3) treatment of any concomitant serious medical problems for which specific treatments are available. There is no general agreement about specific pharmacological treatment regimens for NMS.

Recurrence of NMS has been reported with resumption of drug therapy. If treatment with INGREZZA is needed after recovery from NMS, patients should be monitored for signs of recurrence.

## Parkinsonism

INGREZZA may cause parkinsonism. Parkinsonism has also been observed with other VMAT2 inhibitors. In the 3 placebo-controlled clinical studies in patients with tardive dyskinesia, the incidence of parkinson-like adverse events was 3% of patients treated with INGREZZA and <1% of placebo-treated patients.

In a placebo-controlled clinical study in patients with chorea associated with Huntington's disease, the incidence of parkinson-like adverse events was 4.7% in patients treated with INGREZZA and 0% in placebo-treated patients. Because rigidity can develop as part of the underlying disease process in Huntington's disease, it may be difficult to distinguish between potential drug-induced parkinsonism and progression of underlying Huntington's disease. Drug-induced parkinsonism has the potential to cause more functional disability than untreated chorea for some patients with Huntington's disease.

Postmarketing safety reports have described parkinson-like symptoms in patients taking INGREZZA for tardive dyskinesia, some of which were severe and required hospitalization. In most cases, severe parkinsonism occurred within the first 2 weeks after starting or increasing the dose of INGREZZA. Associated symptoms have included falls, gait disturbances, tremor, drooling and hypokinesia. In cases in which follow-up clinical information was available, parkinson-like symptoms were reported to resolve following discontinuation of INGREZZA therapy. Reduce the dose or discontinue INGREZZA treatment in patients who develop clinically significant parkinson-like signs or symptoms.

## ADVERSE REACTIONS

The following clinically significant adverse reactions are discussed in more detail in other sections of the labeling:

- Depression and Suicidal Ideation and Behavior in Patients with Huntington's Disease
- Hypersensitivity Reactions
- Somnolence and Sedation
- QT Prolongation
- Neuroleptic Malignant Syndrome (NMS)
- Parkinsonism

### Clinical Trials Experience

Because clinical trials are conducted under widely varying conditions, adverse reaction rates observed in the clinical trials of a drug cannot be directly compared to rates in the clinical trials of another drug and may not reflect the rates observed in practice.

### Tardive Dyskinesia

#### Variable and Fixed Dose Placebo-Controlled Trial Experience

The safety of INGREZZA was evaluated in 3 placebo-controlled studies, each 6 weeks in duration (fixed dose, dose escalation, dose reduction), including 445 patients. Patients were 26 to 84 years of age with moderate to severe tardive dyskinesia and had concurrent diagnoses of mood disorder (27%) or schizophrenia/schizoaffective disorder (72%). The mean age was 56 years. Patients were 57% Caucasian, 39% African-American, and 4% other. With respect to ethnicity, 28% were Hispanic or Latino. All subjects continued previous stable regimens of antipsychotics; 85% and 27% of subjects, respectively, were taking atypical and typical antipsychotic medications at study entry.

#### Adverse Reactions Leading to Discontinuation of Treatment

A total of 3% of INGREZZA-treated patients and 2% of placebo-treated patients discontinued because of adverse reactions.

#### Common Adverse Reactions

Adverse reactions that occurred in the 3 placebo-controlled studies at an incidence of ≥2% and greater than placebo are presented in Table 1.

**Table 1: Adverse Reactions in 3 Placebo-Controlled Studies of 6-week Treatment Duration Reported at ≥2% and >Placebo – Tardive Dyskinesia**

| Adverse Reaction <sup>1</sup>                                                                                  | INGREZZA (n=262) % | Placebo (n=183) % |
|----------------------------------------------------------------------------------------------------------------|--------------------|-------------------|
| <b>General Disorders</b>                                                                                       |                    |                   |
| Somnolence (somnolence, fatigue, sedation)                                                                     | 10.9               | 4.2               |
| <b>Nervous System Disorders</b>                                                                                |                    |                   |
| Anticholinergic effects (dry mouth, constipation, disturbance in attention, vision blurred, urinary retention) | 5.4                | 4.9               |
| Balance disorders/fall (fall, gait disturbance, dizziness, balance disorder)                                   | 4.1                | 2.2               |
| Headache                                                                                                       | 3.4                | 2.7               |
| Akathisia (akathisia, restlessness)                                                                            | 2.7                | 0.5               |
| <b>Gastrointestinal Disorders</b>                                                                              |                    |                   |
| Vomiting                                                                                                       | 2.6                | 0.6               |
| Nausea                                                                                                         | 2.3                | 2.1               |
| <b>Musculoskeletal Disorders</b>                                                                               |                    |                   |
| Arthralgia                                                                                                     | 2.3                | 0.5               |

<sup>1</sup>Within each adverse reaction category, the observed adverse reactions are listed in order of decreasing frequency.

#### Other Adverse Reactions Observed During the Premarketing Evaluation of INGREZZA

Other adverse reactions of  $\geq 1\%$  incidence and greater than placebo are shown below. The following list does not include adverse reactions: 1) already listed in previous tables or elsewhere in the labeling, 2) for which a drug cause was remote, 3) which were so general as to be uninformative, 4) which were not considered to have clinically significant implications, or 5) which occurred at a rate equal to or less than placebo.

*Endocrine Disorders:* blood glucose increased

*General Disorders:* weight increased

*Infectious Disorders:* respiratory infections

*Neurologic Disorders:* drooling, dyskinesia, extrapyramidal symptoms (non-akathisia)

*Psychiatric Disorders:* anxiety, insomnia

During the tardive dyskinesia controlled trials, there was a dose-related increase in prolactin. Additionally, in these trials there was a dose-related increase in alkaline phosphatase and bilirubin, suggesting a potential risk for cholestasis.

#### Chorea Associated with Huntington's Disease

The safety of INGREZZA was evaluated in a 14-week placebo-controlled study including 127 patients with chorea associated with Huntington's disease. Patients were 25 to 75 years of age. The mean age was 54 years. Patients were 96% Caucasian, 1% African-American, 1% Asian, and 2% Other. With respect to ethnicity, 6% were Hispanic or Latino.

#### Adverse Reactions Leading to Discontinuation of Treatment

A total of 8% of INGREZZA-treated patients and 6% of placebo-treated patients discontinued because of adverse reactions.

#### Common Adverse Reactions

Adverse reactions that occurred in the placebo-controlled study at an incidence of  $\geq 4\%$  and greater than placebo are presented in Table 2.

**Table 2: Adverse Reactions in the Placebo-Controlled Study of 12-week Treatment Duration Reported at  $\geq 4\%$  and  $>$ Placebo – Chorea Associated with Huntington's Disease**

| Adverse Reaction                                            | INGREZZA (n=64) % | Placebo (n=63) % |
|-------------------------------------------------------------|-------------------|------------------|
| <b>Nervous System Disorders</b>                             |                   |                  |
| Somnolence, lethargy, sedation                              | 18.8              | 3.2              |
| Akathisia                                                   | 6.3               | 4.8              |
| <b>General Disorders and Administration Site Conditions</b> |                   |                  |
| Fatigue                                                     | 14.1              | 9.5              |
| <b>Skin and Subcutaneous Tissue Disorders</b>               |                   |                  |
| Urticaria                                                   | 9.4               | 0                |
| Rash                                                        | 7.8               | 0                |
| <b>Gastrointestinal Disorders</b>                           |                   |                  |
| Diarrhea                                                    | 4.7               | 1.6              |
| Nausea                                                      | 4.7               | 0                |
| <b>Psychiatric Disorders</b>                                |                   |                  |
| Insomnia, middle insomnia                                   | 6.3               | 1.6              |
| Depression, depressed mood                                  | 4.7               | 1.6              |
| <b>Musculoskeletal Disorders</b>                            |                   |                  |
| Back pain                                                   | 4.7               | 0                |

#### Postmarketing Experience

The following adverse reactions have been identified during post-approval use of INGREZZA that are not included in other sections of labeling. Because these reactions are reported voluntarily from a population of uncertain size, it is not always possible to reliably estimate their frequency or establish a causal relationship to drug exposure.

*Immune System Disorders:* hypersensitivity reactions (including allergic dermatitis, and pruritus)

## DRUG INTERACTIONS

### Drugs Having Clinically Important Interactions with INGREZZA

**Table 3: Clinically Significant Drug Interactions with INGREZZA**

| <b>Monoamine Oxidase Inhibitors (MAOIs)</b> |                                                                                                                                                                                                                                                                                                                        |
|---------------------------------------------|------------------------------------------------------------------------------------------------------------------------------------------------------------------------------------------------------------------------------------------------------------------------------------------------------------------------|
| <i>Clinical Implication:</i>                | Concomitant use of INGREZZA with MAOIs may increase the concentration of monoamine neurotransmitters in synapses, potentially leading to increased risk of adverse reactions such as serotonin syndrome, or attenuated treatment effect of INGREZZA.                                                                   |
| <i>Prevention or Management:</i>            | Avoid concomitant use of INGREZZA with MAOIs, or within 14 days of discontinuing therapy with an MAOI.                                                                                                                                                                                                                 |
| <b>Strong CYP3A4 Inhibitors</b>             |                                                                                                                                                                                                                                                                                                                        |
| <i>Clinical Implication:</i>                | Concomitant use of INGREZZA with strong CYP3A4 inhibitors increased the exposure (C <sub>max</sub> and AUC) to valbenazine and its active metabolite compared with the use of INGREZZA alone. Increased exposure of valbenazine and its active metabolite may increase the risk of exposure-related adverse reactions. |
| <i>Prevention or Management:</i>            | Reduce INGREZZA dose when INGREZZA is coadministered with a strong CYP3A4 inhibitor.                                                                                                                                                                                                                                   |
| <b>Strong CYP2D6 Inhibitors</b>             |                                                                                                                                                                                                                                                                                                                        |
| <i>Clinical Implication:</i>                | Concomitant use of INGREZZA with strong CYP2D6 inhibitors increased the exposure (C <sub>max</sub> and AUC) to valbenazine's active metabolite compared with the use of INGREZZA alone. Increased exposure of active metabolite may increase the risk of exposure-related adverse reactions.                           |
| <i>Prevention or Management:</i>            | Reduce INGREZZA dose when INGREZZA is coadministered with a strong CYP2D6 inhibitor.                                                                                                                                                                                                                                   |
| <b>Strong CYP3A4 Inducers</b>               |                                                                                                                                                                                                                                                                                                                        |
| <i>Clinical Implication:</i>                | Concomitant use of INGREZZA with a strong CYP3A4 inducer decreased the exposure of valbenazine and its active metabolite compared to the use of INGREZZA alone. Reduced exposure of valbenazine and its active metabolite may reduce efficacy.                                                                         |
| <i>Prevention or Management:</i>            | Concomitant use of strong CYP3A4 inducers with INGREZZA is not recommended.                                                                                                                                                                                                                                            |
| <b>Digoxin</b>                              |                                                                                                                                                                                                                                                                                                                        |
| <i>Clinical Implication:</i>                | Concomitant use of INGREZZA with digoxin increased digoxin levels because of inhibition of intestinal P-glycoprotein (P-gp).                                                                                                                                                                                           |
| <i>Prevention or Management:</i>            | Digoxin concentrations should be monitored when co-administering INGREZZA with digoxin. Increased digoxin exposure may increase the risk of exposure-related adverse reactions. Dosage adjustment of digoxin may be necessary.                                                                                         |

## OVERDOSAGE

### Human Experience

The pre-marketing clinical trials involving INGREZZA in approximately 850 subjects do not provide information regarding symptoms with overdose.

### Management of Overdosage

No specific antidotes for INGREZZA are known. In managing overdose, provide supportive care, including close medical supervision and monitoring, and consider the possibility of multiple drug involvement. If an overdose occurs, consult a Certified Poison Control Center (1-800-222-1222 or www.poison.org).

For further information on INGREZZA, call 84-INGREZZA (844-647-3992).

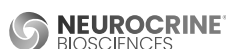

Distributed by:  
Neurocrine Biosciences, Inc.  
San Diego, CA 92130

INGREZZA is a registered trademark  
of Neurocrine Biosciences, Inc.  
CP-VBZ-US-2810 08/2023

FOR YOUR ADULT PATIENTS WITH TARDIVE DYSKINESIA (TD)

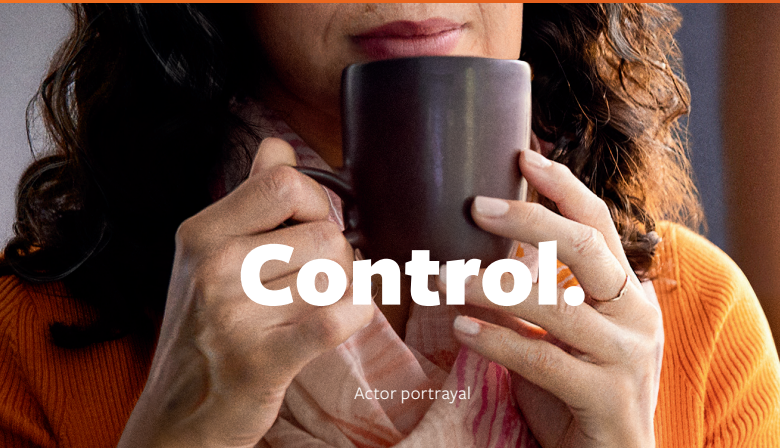

Actor portrayal

ADVERTISEMENT

ONCE-DAILY  
**INGREZZA**<sup>®</sup>  
(valbenazine) capsules

# Made simple.

INGREZZA is the only one-capsule, once-daily choice proven to reduce TD severity<sup>1</sup>

## UNIQUELY SELECTIVE

Only INGREZZA exclusively delivers **one primary metabolite (+  $\alpha$ )** for potent and selective inhibition of VMAT2<sup>1-3,\*</sup>

## PROVEN EFFICACY

INGREZZA 80 mg reduced uncontrolled movements in **7 of 10 patients at 6 weeks** (post hoc analysis)<sup>1,4,†</sup>

## SIMPLE FROM THE START

The only VMAT2 inhibitor that offers **an effective starting dosage** you can adjust based on response and tolerability<sup>1</sup>

## SAVINGS & SUPPORT

**\$10 or less out-of-pocket** is what most patients pay for INGREZZA<sup>5</sup>

\*Based on *in vitro* VMAT2 binding affinity of dihydrotetraabenazine (HTBZ) metabolites and INGREZZA's primary active metabolite, +  $\alpha$  HTBZ. The clinical significance of *in vitro* data is unknown and is not meant to imply clinical outcomes.

†Post hoc analysis included patients who had a baseline and a Week 6 AIMS total score. Reduction in uncontrolled movements as assessed by  $\geq 1$ -point decrease in AIMS total score.

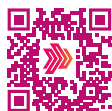

Visit [INGREZZAHCP.com/Results](https://www.ingrezzahcp.com/Results) to see how you can help your TD patients take control

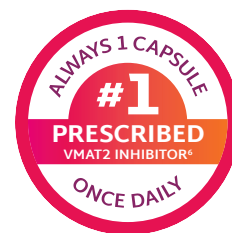

## Important Information

### INDICATION & USAGE

INGREZZA<sup>®</sup> (valbenazine) capsules is indicated in adults for the treatment of tardive dyskinesia and for the treatment of chorea associated with Huntington's disease.

### IMPORTANT SAFETY INFORMATION

**Depression and Suicidality in Patients with Huntington's Disease: VMAT2 inhibitors, including INGREZZA, can increase the risk of depression and suicidal thoughts and behavior (suicidality) in patients with Huntington's disease. Balance the risks of depression and suicidality with the clinical need for treatment of chorea. Closely monitor patients for the emergence or worsening of depression, suicidal ideation, or unusual changes in behavior. Inform patients, their caregivers, and families of the risk of depression and suicidal ideation and behavior and instruct them to report behaviors of concern promptly to the treating physician. Exercise caution when treating patients with a history of depression or prior suicide attempts or ideation, which are increased in frequency in patients with Huntington's disease.**

### CONTRAINDICATIONS

INGREZZA is contraindicated in patients with a history of hypersensitivity to valbenazine or any components of INGREZZA.

### WARNINGS & PRECAUTIONS

#### Hypersensitivity Reactions

Hypersensitivity reactions, including cases of angioedema involving the larynx, glottis, lips, and eyelids, have been reported in patients after taking the first or subsequent doses of INGREZZA. Angioedema associated with laryngeal edema can be fatal. If any of these reactions occur, discontinue INGREZZA.

#### Somnolence and Sedation

INGREZZA can cause somnolence and sedation. Patients should not perform activities requiring mental alertness such as operating a motor vehicle or operating hazardous machinery until they know how they will be affected by INGREZZA.

#### QT Prolongation

INGREZZA may prolong the QT interval, although the degree of QT prolongation is not clinically significant at concentrations expected with recommended dosing. INGREZZA should be avoided in patients with congenital long QT syndrome or with arrhythmias associated with a prolonged QT interval. For patients at increased risk of a prolonged QT interval, assess the QT interval before increasing the dosage.

## WARNINGS & PRECAUTIONS (continued)

### Neuroleptic Malignant Syndrome

A potentially fatal symptom complex referred to as Neuroleptic Malignant Syndrome (NMS) has been reported in association with drugs that reduce dopaminergic transmission, including INGREZZA. The management of NMS should include immediate discontinuation of INGREZZA, intensive symptomatic treatment and medical monitoring, and treatment of any concomitant serious medical problems. If treatment with INGREZZA is needed after recovery from NMS, patients should be monitored for signs of recurrence.

### Parkinsonism

INGREZZA may cause parkinsonism. Parkinsonism has also been observed with other VMAT2 inhibitors. Reduce the dose or discontinue INGREZZA treatment in patients who develop clinically significant parkinson-like signs or symptoms.

### ADVERSE REACTIONS

The most common adverse reaction in patients with tardive dyskinesia ( $\geq 5\%$  and twice the rate of placebo) is somnolence.

The most common adverse reactions in patients with Huntington's disease ( $>5\%$  and twice the rate of placebo) are somnolence/lethargy/sedation, urticaria, rash, and insomnia.

You are encouraged to report negative side effects of prescription drugs to the FDA. Visit MedWatch at [www.fda.gov/medwatch](https://www.fda.gov/medwatch) or call 1-800-FDA-1088.

**Please see the adjacent pages for Brief Summary of Prescribing Information and visit [neurocrine.com/INGREZZAPI](https://www.neurocrine.com/INGREZZAPI) for full Prescribing Information, including Boxed Warning.**

**REFERENCES:** 1. INGREZZA [package insert]. San Diego, CA: Neurocrine Biosciences, Inc. 2. Harriott ND, Williams JP, Smith EB, Bozigian HP, Grigoriadis DE. VMAT2 inhibitors and the path to INGREZZA (valbenazine). *Prog Med Chem.* 2018;57(1):87-111. 3. Grigoriadis DE, Smith E, Hoare SRJ, Madan A, Bozigian H. Pharmacologic characterization of valbenazine (NBI-98854) and its metabolites. *J Pharmacol Exp Ther.* 2017;361(3):454-461. 4. Data on file. Neurocrine Biosciences, Inc. 5. Measured by NDC; data on file as of Q2 2023. Neurocrine Biosciences, Inc. 6. Data on file as of Q4 2022. Neurocrine Biosciences, Inc.

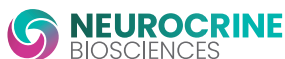

©2024 Neurocrine Biosciences Inc. All Rights Reserved.  
CP-VBZ-US-3125 03/2024
